# Supplementary material for: Statistical inference of a convergent antibody repertoire response to influenza vaccine
Source: PubMed Central journal article supplement (PMC4891843; doi:10.1186/s13073-016-0314-z), 2016-06-03
Supplement: 13073_2016_314_MOESM2_ESM.pdf [file 13073_2016_314_MOESM2_ESM.pdf]

Identification

Screening

Eligibility

Included

Number of records identified through database searching:  
14

Number of additional records identified through other sources:  
0

Number of records after duplicates removed:  
0

Number of records screened:  
14

Number of records excluded:  
0

Number of full-text articles assessed for eligibility:  
14

Number of full text articles excluded with reasons:  
7  
(the studies either did not provide sequence information, used a non-human protocol, or had overlapping data with other studies in the set, see PRISMA statement)

Number of studies included in qualitative synthesis:  
7

Number of studies included in quantitative synthesis:  
7
